# Supplementary material for: The impact of selected methodological factors on data collection outcomes in observational studies of device-measured physical behaviour in adults: A systematic review
Source: PubMed Central journal article supplement (PMC9993720; doi:10.1186/s12966-022-01388-9), 2023-03-08
Supplement: 12966_2022_1388_MOESM1_ESM.pdf [file 12966_2022_1388_MOESM1_ESM.pdf]

## Supplementary figure 1. Example search strategy

### **Terms**

1. (physical adj2 (activit\* or inactivit\* or behavio\* or exercise).ti.ab
2. (sedentary adj2 (activit\* or behavio\*). ti.ab
3. (sitting adj2 (time or behavio\*). ti.ab
4. accleromet\* ti.ab
5. (activity adj2 (monitor\* or device). ti.ab
6. motion sensor. ti.ab
7. inclinometer. ti.ab
8. observational adj2 (stud\* or cohort). ti.ab
9. cohort adj2 (stud\*). ti.ab
10. cross-sectional. ti.ab
11. prospective. ti.ab

### **Example strategy**

1 or 2 or 3

and

4 or 5 or 6 or 7

and

8 or 9 or 10 or 11

### **Search Limits:**

Participants: adult, human

Articles: Journal articles, English, Full-text, Journal articles, published in English, full text available\*
